# Supplementary material
Source: publisher site journal article supplement (https://www.dovepress.com/article/421053)
Supplement: Supplementary file 1 [file get_supplementary_file.php]

**Supplementary data 1** Comparison of characteristics between randomized and non-randomized groups among 1,151 screened older individuals who experienced a fall at home, with no hospitalization or with hospitalization less than 24 hours.

|  | Non randomized (N=200) | Randomized (N=951) | *P value* | Test |
| --- | --- | --- | --- | --- |
| **Age** |  |  |  |  |
| 70-79 | 47 (23.5%) | 264 (27.8%) | 0,319 | fisher test |
| 80-89 | 98 (49.0%) | 465 (48.9%) | - | fisher test |
| 90< | 55 (27.5%) | 222 (23.3%) | - | - |
|  |  |  |  |  |
| **Sex** |  |  |  |  |
| Women | 144 (72.0%) | 613 (64.5%) | 0,041 | fisher test |
| Men | 56 (28.0%) | 338 (35.5%) | - | - |
|  |  |  |  |  |
| **Time of fall** |  |  |  |  |
| 0h-4h | 30 (16.0%) | 100 (11.7%) | 0,492 | chisq.test |
| 4h-8h | 28 (14.9%) | 119 (13.9%) | - | - |
| 8h-12h | 54 (28.7%) | 246 (28.7%) | - | - |
| 12h-16h | 26 (13.8%) | 113 (13.2%) | - | - |
| 16h-20h | 28 (14.9%) | 166 (19.3%) | - | - |
| 20h-24h | 22 (11.7%) | 114 (13.3%) | - | - |
|  |  |  |  |  |
| **Life style** |  |  |  |  |
| Living alone | 42 (52.5%) | 414 (43.6%) | 0,129 | fisher test |
| Living with a partner/family | 38 (47.5%) | 536 (56.4%) | - | - |
|  |  |  |  |  |
| **Location of fall** |  |  |  |  |
| Bedroom | 67 (34.5%) | 257 (27.6%) | - | - |
| Hall | 4 (2.1%) | 53 (5.7%) | - | - |
| Kitchen | 22 (11.3%) | 115 (12.4%) | - | - |
| Entrance hall | 2 (1.0%) | 11 (1.2%) | - | - |
| Stairs | 6 (3.1%) | 44 (4.7%) | - | - |
| Immediate surroundings of the home (garden, terrace, balcony, lift, etc.) | 21 (10.8%) | 142 (15.3%) | - | - |
| Garage | 2 (1.0%) | 9 (1.0%) | - | - |
| Storage room | 2 (1.0%) | 7 (0.8%) | - | - |
| Bathroom | 8 (4.1%) | 57 (6.1%) | - | - |
| Living room | 44 (22.7%) | 185 (19.9%) | - | - |
| Restroom | 14 (7.2%) | 46 (4.9%) | - | - |
| Other | 2 (1.0%) | 4 (0.4%) | 0,197 | chisq.test |
|  |  |  |  |  |
| **Activity prior to or during the fall** |  |  |  |  |
| Handy work/gardening | 5 (2.7%) | 33 (3.8%) | - | - |
| Positional change (getting up, sitting down, bend over) | 65 (35.7%) | 309 (35.2%) | - | - |
| Using stairs | 6 (3.3%) | 43 (4.9%) | - | - |
| Using the restroom | 2 (1.1%) | 4 (0.5%) | - | - |
| Dressing/undressing | 3 (1.6%) | 17 (1.9%) | - | - |
| Eating | 1 (0.5%) | 5 (0.6%) | - | - |
| Walking | 86 (47.3%) | 351 (40.0%) | - | - |
| Grooming/Bathing | 3 (1.6%) | 20 (2.3%) | - | - |
| Housekeeping/daily routines | 8 (4.4%) | 51 (5.8%) | - | - |
| Other | 3 (1.6%) | 45 (5.1%) | 0,417 | chisq.test |
|  |  |  |  |  |
| **Person who called the EMS when fall happened** |  |  |  |  |
| Friend | 2 (1.0%) | 16 (1.7%) | - | - |
| Other member of the family | 9 (4.6%) | 46 (4.9%) | - | - |
| Partner | 49 (25.3%) | 273 (29.0%) | - | - |
| Children | 42 (21.6%) | 210 (22.3%) | - | - |
| Faller | 50 (25.8%) | 231 (24.5%) | - | - |
| Fall alarm | 13 (6.7%) | 64 (6.8%) | - | - |
| Neighbor | 14 (7.2%) | 46 (4.9%) | - | - |
| Other | 3 (1.5%) | 15 (1.6%) | - | - |
|  |  |  |  |  |
| **Fall severity** |  |  |  |  |
| No physical injury | 77 (38.9%) | 370 (39.4%) | 0,969 | fisher test |
| Minor injury (hematoma, wound without stitching) | 75 (37.9%) | 359 (38.2%) | - | - |
| Moderate injury (wound stitching, fracture) | 46 (23.2%) | 211 (22.4%) | - | - |
|  |  |  |  |  |
| **Fall consequences** |  |  |  |  |
| No consequence | 67 (33.5%) | 296 (31.1%) | 0,504 | fisher test |
| Activity restriction | 49 (24.5%) | 258 (27.1%) | 0,482 | fisher test |
| Fear of falling | 46 (23.0%) | 227 (23.9%) | 0,855 | fisher test |
| Pain | 106 (53.0%) | 504 (53.0%) | 1 | fisher test |
| Difficulty to continue living in his/her home | 4 (2.0%) | 17 (1.8%) | 0,774 | fisher test |
| Mood disorders, depression, sadness | 17 (8.5%) | 92 (9.7%) | 0,691 | fisher test |
| Other | 16 (11.3%) | 57 (8.1%) | 0,248 | fisher test |
|  |  |  |  |  |
| **Fall circumstances*** |  |  |  |  |
| Accidental | 137 (78.7%) | 635 (74.8%) | - | - |
| Intrinsic reasons (arthrosis, vision, etc.) | 21 (12.1%) | 109 (12.8%) | - | - |
| Dizziness | 15 (8.6%) | 90 (10.6%) | - | - |
| Other | 1 (0.6%) | 15 (1.8%) | 0,617 | fisher test |
|  |  |  |  |  |
| **Falls in the last 12 months** |  |  |  |  |
| Yes | 8 (57.1%) | 701 (73.8%) | 0,218 | fisher test |
| Number of falls |  |  |  |  |
| 1 | 1 (14.3%) | 213 (31.4%) | 0,022 | fisher test |
| 2 | 0 (0%) | 124 (18.3%) | - | - |
| 3 | 1 (14.3%) | 125 (18.4%) | - | - |
| 4 | 3 (42.9%) | 58 (8.6%) | - | - |
| 5 | 1 (14.3%) | 32 (4.7%) | - | - |
| 5 to 10 | 0 (0%) | 71 (10.5%) | - | - |
| 10 to 20 | 0 (0%) | 35 (5.2%) | - | - |
| 20 and over | 1 (14.3%) | 20 (2.9%) | - | - |
|  |  |  |  |  |
| Injury induced fall in the last 12 months | 5 (62.5%) | 412 (55.8%) | 1 | - |
| Visit of one's referring doctor | 4 (80.0%) | 211 (51.0%) | 0,373 | fisher test |
| EMS use | 5 (100.0%) | 268 (66.7%) | 0,176 | fisher test |
| ED visit | 4 (80.0%) | 246 (61.0%) | 0,653 | fisher test |
| Hospitalization | 2 (40.0%) | 79 (19.6%) | 0,259 | fisher test |
| Self-lift after falling | 0 (0%) | 135 (18.9%) | 0,363 | fisher test |
| if not, remaining on the floor more than one hour | 1 (14.3%) | 154 (27.7%) | 0,68 | fisher test |
| Specific measures taken to prevent future falls | 6 (75.0%) | 451 (62.7%) | 0,717 | fisher test |
| Fall-preventive assistive devices (handrails for stairways) | 1 (16.7%) | 157 (36.9%) | 0,422 | fisher test |
| Removing unsecured carpet | 0 (0%) | 177 (41.6%) | 0,086 | fisher test |
| Walking aid | 5 (83.3%) | 354 (80.6%) | 1 | fisher test |
| Using proper no-slip foot-wear | 0 (0%) | 124 (30.8%) | 0,184 | fisher test |
| Other | 2 (33.3%) | 119 (35.5%) | 1 | - |

**Note:** Reported N are ‘yes’ responses.

*Data collected based on the participant's or the family/legal representative's assessment.

**Abbreviations:** EMS, Emergency Medical Service; ED, Emergency Department.
